1                   **Optogenetic control of gut bacterial metabolism to promote longevity**

2   Lucas A. Hartsough<sup>1</sup>, Matthew V. Kotlajich<sup>1</sup>, Bing Han<sup>3,7</sup>, Chih-Chun J. Lin<sup>3,4</sup>, Lauren Gambill<sup>2</sup>,

3                                   Meng C. Wang<sup>\*3,4,5</sup>, Jeffrey J. Tabor<sup>\*1,2,6</sup>

4

5           <sup>1</sup>Department of Bioengineering, <sup>2</sup>Systems, Synthetic, and Physical Biology Program, Rice

6   University, Houston, TX; <sup>3</sup>Huffington Center on Aging, <sup>4</sup>Department of Molecular & Human

7   Genetics, Baylor College of Medicine, Houston, TX; <sup>5</sup>Howard Hughes Medical Institute;

8   <sup>6</sup>Department of Biosciences, Rice University; <sup>7</sup>Current Address: Children's Hospital & Institutes

9                                   of Biomedical Sciences, Fudan University, Shanghai, China, 201102

10

11

\*corresponding authors

12 **Abstract**

13 Gut microbial metabolism is associated with host longevity. However, because it requires  
14 direct manipulation of microbial metabolism *in situ*, establishing a causal link between these two  
15 processes remains challenging. We demonstrate an optogenetic method to control gene  
16 expression and metabolite production from bacteria residing in the host gut. We genetically  
17 engineer an *Escherichia coli* strain that synthesizes and secretes colanic acid (CA) under the  
18 quantitative control of light. Using this optogenetically-controlled strain to induce CA production  
19 directly in the *Caenorhabditis elegans* gut, we reveal the local effect of CA in protecting  
20 intestinal mitochondria from stress-induced hyper-fragmentation. We also exploit different  
21 intensities of light to determine that the lifespan-extending effect of CA is positively correlated  
22 with its levels produced from bacteria. Our results show that optogenetic control offers a rapid,  
23 reversible and quantitative way to fine-tune gut bacterial metabolism and uncover its local and  
24 systemic effects on host health and aging.

25

## 26 **Introduction**

27           Microbiome studies have identified correlations between bacteria and host aging (Kundu  
28 et al., 2017; O'Toole and Jeffery, 2015). For example, 16S rRNA and metagenomic DNA  
29 sequencing are used to associate the presence or abundance of specific bacteria to human  
30 centenarians (Biagi et al., 2016; Claesson et al., 2012, 2010). However, given the complexity and  
31 heterogeneity of the human gut environment, these approaches are unable to elucidate how a  
32 specific microbial species contributes to longevity. The nematode *Caenorhabditis elegans* has a  
33 short and easily-measured lifespan, features that have revolutionized our understanding of the  
34 molecular genetics of aging and longevity (Kenyon, 2010). Studies using *C. elegans* also provide  
35 mechanistic insight into the association between bacterial species and host longevity (Gusarov et  
36 al., 2013; Kim, 2013). Importantly, recent studies have revealed that bacterial metabolism can  
37 produce specific products to directly influence the aging process in the host *C. elegans* or  
38 modulate the effects of environmental cues on *C. elegans* lifespan (Cabreiro et al., 2013; Pryor et  
39 al., 2019; Virk et al., 2016). These findings highlight the significance of bacterial metabolism in  
40 regulating host physiology during the aging process and have inspired interest in directly  
41 manipulating bacterial metabolism *in situ* in the host gastrointestinal (GI) tract.

42           In several recent studies, researchers have administered antibiotic- or carbohydrate-based  
43 small molecule inducers to modulate gene expression from gut bacteria (Kotula et al., 2014; Lim  
44 et al., 2017; Mimee et al., 2015). While this approach has enabled the *in situ* analysis of a gut  
45 bacterial-host interaction (Lim et al., 2017), chemical effectors may have unwanted side-effects  
46 on host or microbial physiology and subject to slow and poorly-controlled transport and  
47 degradation processes that ultimately limit their precision.

48 Optogenetics combines light and genetically-engineered photoreceptors to achieve  
49 unrivaled control of biological processes (Olson and Tabor, 2014). Previously, we and others  
50 have engineered bacterial photoreceptors that activate or repress gene expression in response to  
51 specific wavelengths of light (Levskeya et al., 2005; Li et al., 2020; Ohlendorf et al., 2012; Ong  
52 and Tabor, 2018; Ong et al., 2017; Ramakrishnan and Tabor, 2016; Ryu and Gomelsky, 2014;  
53 Schmidl et al., 2014). These photoreceptors have been used to achieve precise quantitative  
54 (Olson et al., 2017, 2014), temporal (Chait et al., 2017; Miliias-Argeitis et al., 2016; Olson et al.,  
55 2017, 2014), and spatial (Chait et al., 2017; Levskeya et al., 2005; Ohlendorf et al., 2012; Tabor  
56 et al., 2010) control of bacterial gene expression in culture conditions. They have also been used  
57 to characterize and control transcriptional regulatory circuits (Chait et al., 2017; Olson et al.,  
58 2014; Tabor et al., 2009) and bacterial metabolic pathways (Fernandez-Rodriguez et al., 2017;  
59 Tandar et al., 2019) *in vitro*. Here, we hypothesized that optogenetic control of bacterial gene  
60 expression might provide a new way to manipulate bacterial metabolism *in vivo* in the host GI  
61 tract, with high temporal and spatial precision and no unwanted side-effects.

62 We address this possibility using the *E. coli-C. elegans* interaction model, a testable  
63 system with known mechanistic links between bacterial metabolism and host longevity and with  
64 complete optical transparency. In particular, CA is an exopolysaccharide synthesized and  
65 secreted from *E. coli*, which can extend the lifespan of the host *C. elegans* through modulating  
66 mitochondrial dynamics (Han et al., 2017). We thus have genetically engineered an *E. coli* strain  
67 to put its biosynthesis of CA under a switchable control between green and red lights, and then  
68 utilized green light to induce CA production from this strain in the gut of the host *C. elegans*. We  
69 discovered that light-induced CA from bacteria residing in the host is sufficient to modulate  
70 mitochondrial dynamics and lifespan, which gives even more potent effects than dietary

71 supplementation of CA. Furthermore, this optogenetic manipulation allowed us to investigate the  
72 local effect of CA on intestinal cells in a time-controlled manner and its systemic effect on  
73 organisms in a quantitative way, which are not possible with purified CA or CA-overproducing  
74 genetic mutants. This work paves the road for future application of bacterial optogenetics in  
75 understanding bacteria-host interaction with temporal, spatial and quantitative controls and  
76 minimal chemical interference.

77

## 78 **Results**

79 To demonstrate optogenetic control over gut bacterial gene expression, we first  
80 engineered *E. coli* strain LH01, wherein our previous light-switchable two-component system  
81 CcaSR (Schmidl et al., 2014) controls expression of superfolder green fluorescent protein (*sfgfp*),  
82 and *mcherry* is expressed constitutively to facilitate identification of the bacteria (**Fig. 1a**,  
83 **Supplementary Fig. 1, Supplementary Tables 1-3**). In LH01, green light exposure switches  
84 CcaS to an active state in the presence of chromophore phycocyanobilin (PCB), wherein it  
85 phosphorylates the response regulator CcaR. Phosphorylated CcaR then activates transcription of  
86 *sfgfp* from the P<sub>cpcG2-172</sub> output promoter. Red light reverts active CcaS to the inactive form, de-  
87 activating *sfgfp* expression (**Fig. 1a**).

88 We then reared two groups of *C. elegans* from the larval to the adult stage on plates of  
89 LH01 under red or green light, respectively (**Fig. 1b**). Next, we washed away external bacteria,  
90 applied the paralyzing agent levamisole to prevent expulsion of gut contents, and transferred the  
91 worms to agar pads. Finally, we switched the light color from red to green, or green to red, and  
92 used epi-fluorescence microscopy to image the resulting changes in fluorescence in the gut  
93 lumen over time (**Fig. 1c**). In the red-to-green (step ON) experiment, we observed that sfGFP

94 fluorescence in the worm gut lumen starts low, begins to increase within 2 hours, and reaches a  
95 saturated high level at 6 hours (**Fig. 1d**). In contrast, in the green-to-red (step OFF) experiment,  
96 sfGFP fluorescence begins high, and decreases exponentially between hours 1-7 (**Fig. 1d**). This  
97 light response is abolished when the PCB biosynthetic operon is removed ( $\Delta$ PCB) (**Fig. 1d**),  
98 demonstrating that sfGFP levels are specifically controlled by CcaSR.

99       Next, we used flow cytometry to achieve high-throughput single-cell resolution analysis  
100 of this *in situ* bacterial light response. Specifically, we reared worms in red and green light as  
101 before, but then washed, paralyzed, and placed them into microtubes prior to light switching  
102 (**Fig. 1b**). At several time points over the course of 8 hours, we homogenized the animals,  
103 harvested the gut contents, and sorted bacterial cells and measured fluorescence via cytometry.  
104 This experiment revealed that bacteria in the host gut remain intact (**Supplementary Fig. 2**) and  
105 respond to light in a unimodal fashion (**Fig. 1e-g**). Furthermore, the temporal dynamics of the  
106 gene expression response and dependence on PCB recapitulate our microscopy results  
107 (**Supplementary Fig. 3**). We also confirmed that residual bacteria on the exterior of worms do  
108 not contribute to the flow cytometry measurements (**Supplementary Fig. 4**). Together, these  
109 experiments demonstrate that we can use optogenetics to rapidly, reversibly induce gene  
110 expression of *E. coli* residing in the *C. elegans* gut.

111       Next, we sought to utilize our optogenetic method to modulate the production of specific  
112 metabolites in bacteria residing in the gut of live hosts. It is well-known that bacterial genes  
113 involved in the same metabolic process are often clustered into operons and co-regulated at the  
114 transcriptional level. We took advantage of this coordinated mode of regulation and chose the  
115 *cps* operon and its transcription activator RcsA for testing optogenetic control of bacterial  
116 metabolism. The *cps* operon in *E. coli* consists of 19 genes that encode enzymes required for the

117 biosynthesis and secretion of CA (Torres-Cabassa and Gottesman, 1987), and CA-overproducing  
118 bacterial mutants  $\Delta lon$  and  $\Delta hns$  promote longevity in the host *C. elegans* (Han et al., 2017). To  
119 place CA biosynthesis under optogenetic control, we engineered an *E. coli* strain (MVK29)  
120 lacking genomic *rcaA* and expressing a heterologous copy of *rcaA* under the control of CcaSR  
121 (**Fig. 2a, Supplementary Tables 1-3**). We first examined whether MVK29 could respond to  
122 green light and induce CA production and secretion. To this end, we grew the strain in batch  
123 culture under red or green light and quantified supernatant CA levels. In red light, MVK29  
124 secretes CA to concentrations below the limit of detection of the assay, similar to the  $\Delta rcaA$   
125 mutant (**Fig. 2b**). Green light, on the other hand, induces MVK29 to secrete high levels of CA,  
126 and removal of the PCB biosynthetic operon abolishes this response (**Fig. 2b**). Moreover,  
127 mutation of the CcaS catalytic histidine to a non-functional alanine (H534A), or the CcaR  
128 phosphorylation site from an aspartic acid to a non-functional asparagine (D51N) abolishes  
129 detectable CA production (**Fig. 2b**). Importantly, the level of secreted CA increases sigmoidally  
130 with green light intensity, similar to the response of CcaSR itself (**Fig. 2c**) (Schmidl et al., 2014).  
131 We conclude that we have placed CA production under the control of the CcaSR system, and  
132 that we can use light to tune the production of bacterial metabolites.

133 We then used this approach to study a gut bacterial metabolite-host interaction pathway  
134 *in vivo*. We first reared worms expressing mitochondrially-localized GFP (mito-GFP)  
135 (**Supplementary Table 3**) on MVK29 with red light. We then continued this red-light exposure  
136 for one group, and switched a second to green, for an additional 6 hours, and immediately  
137 imaged intestinal cell mitochondrial morphology using confocal microscopy (**Fig. 3b**). We found  
138 that mitochondrial fragmentation increases in worms exposed to the bacteria with light-induced

139 CA secretion (**Fig. 3c**). This result recapitulates the phenotype observed in worms supplemented  
140 with purified CA (Han et al., 2017).

141 Next, we induced CA production directly from bacteria residing within the host gut. To  
142 this end, we paralyzed the worms carrying mito-GFP, split them into two groups, and treated one  
143 with red and the second with green for 6 hours (**Fig. 3a**). We then analyzed mitochondrial  
144 morphology in intestinal cells using confocal microscopy. We found that the 6-hour levamisole  
145 treatment does not kill worms but leads to mitochondrial hyper-fragmentation (**Fig. 3d**), which  
146 might be due to the inhibitory effect of levamisole on mitochondrial NADH-oxidizing enzymes  
147 (Köhler and Bachmann, 1978). This stress-induced effect resembles mitochondrial decay related  
148 to aging and age-related neurodegenerative diseases (Cho et al., 2009; Exner et al., 2007;  
149 Sebastián et al., 2017). Interestingly, we found that green light exposure counteracts this hyper-  
150 fragmentation in paralyzed worms bearing MVK29 in the gut (**Fig. 3d**). Importantly, we found  
151 no such effects in worms bearing the  $\Delta$ PCB, CcaS(H534A), CcaR(D51N) or  $\Delta$ *rcaA* mutant  
152 strains (**Fig. 3d**), suggesting that this protective effect is a result of light-induced CA  
153 overproduction in the gut. These results not only show that optogenetics can be utilized to induce  
154 CA secretion from gut-borne *E. coli in vivo*, but also reveal a local protective effect of CA on  
155 intestinal cells.

156 Finally, we took the advantage of the quantitative control afforded by optogenetics to  
157 investigate how the lifespan-extending effect of CA relates to CA levels. Beginning at the day-1  
158 adult stage, we exposed worms bearing MVK29 to red, or two green light intensities resulting in  
159 intermediate or high CA secretion, and measured their lifespans. We found that the lifespan  
160 extension increases proportionally with green-light intensity (**Fig. 4a**), revealing the pro-  
161 longevity effect of CA is dose dependent. We also noticed that the extent of lifespan extension



162 by light is much stronger than that caused by dietary supplementation of purified CA (Han et al.,  
163 2017), suggesting the high efficacy of optogenetic induction to modulate host physiology. As a  
164 control, we repeated the experiment with worms bearing the CA-overproducing  $\Delta lon$  mutant and  
165 showed that the lifespan extension caused by  $\Delta lon$  is independent of light exposure (**Fig. 4b**).  
166 The extent of lifespan extension is similar to the MVK29 intermediate green light condition, but  
167 less than the MVK29 high green light condition (**Fig. 4a, b**), suggesting that MVK29 is capable  
168 of producing higher levels of CA than  $\Delta lon$ . In addition, the lifespan of worms bearing the  $\Delta rcsA$   
169 mutant is also light-independent and is comparable to that of MVK29 worms under red light  
170 (**Fig. 4a, c**). These results suggest that optogenetic control is sufficient to induce bacterial  
171 production of pro-longevity compounds and improve host health, and can exert stronger  
172 beneficial effects than administration of a bacterial mutant or supplementing purified  
173 compounds. Importantly, unlike the traditional approach of introducing a bacterial mutant,  
174 optogenetic control of bacterial metabolism can modulate a host-level phenotype in a  
175 quantitative manner.

176

## 177 **Discussion**

178 Our method has broad applications for studying microbe-host interactions *in situ*. For  
179 example, we have identified about two dozen additional *E. coli* genes that are unrelated to CA  
180 biosynthesis and that enhance worm longevity when knocked out (Han et al., 2017), though the  
181 mechanisms by which they act remain largely unclear. By using light to induce their expression  
182 in the gut and measuring acute host responses such as changes in mitochondrial dynamics, the  
183 role of these genes in gut microbe-host interactions could be further explored. In another  
184 example, the quorum-sensing peptide CSF and nitric oxide, both of which are produced by

185 *Bacillus subtilis* during biofilm formation, have been found to extend worm lifespan through  
186 downregulation of the insulin-like signaling pathway (Donato et al., 2017). We have recently  
187 ported CcaSR into *B. subtilis* and demonstrated that it enables rapid and precise control of gene  
188 expression dynamics (Castillo-Hair et al., 2019). The method we report here should enable *in*  
189 *situ* studies of how gene expression and metabolite production from this important Gram-positive  
190 model bacterium impact longevity as well.

191 Multiple photoreceptors could also be combined to study more complex microbe-host  
192 interaction pathways. Specifically, we and others have co-expressed CcaSR with independently-  
193 controllable blue/dark and red/far-red reversible light sensors in order to achieve simultaneous  
194 and independent control of the expression of up to three genes in the same bacterial cell  
195 (Fernandez-Rodriguez et al., 2017; Olson et al., 2017; Tabor et al., 2010). Such optogenetic  
196 multiplexing could be performed *in situ* and used to study potential synergistic, antagonistic, or  
197 other higher-order effects of multiple bacterial genes or pathways. A large number of eukaryotic  
198 photoreceptors have also been developed, enabling optical control of many cell- and  
199 neurobiological processes (Deisseroth, 2015; Gautier et al., 2014; Goglia and Toettcher, 2018;  
200 Leopold et al., 2018). Bacterial and eukaryotic photoreceptors could be combined to enable  
201 simultaneous optical manipulation of bacterial and host pathways in order to interrogate whether  
202 or how they interact. Optogenetics could also be used to manipulate bacterial and/or host  
203 pathways at specific locations within the gut to examine location- or tissue-dependent  
204 phenomena.

205 Finally, our method could be extended to other bacteria or hosts. In particular, it should  
206 be possible to port CcaSR or other bacterial photoreceptors into native *C. elegans* symbionts  
207 (Zhang et al., 2017) or pathogens(Couillault and Ewbank, 2002). Because these strains stably

208 colonize the host, the use of these bacteria could eliminate the need for paralysis, and facilitate  
209 longer-term experiments. It is likely that light can also be used to control gut bacterial gene  
210 expression in other model hosts such as flies, zebrafish, or mammals. Red-shifted wavelengths  
211 and corresponding optogenetic tools(Ong et al., 2017; Ryu and Gomelsky, 2014) may prove  
212 superior for less optically transparent or larger animals. Overall, by enabling precision control of  
213 bacterial gene expression and metabolism *in situ*, we believe that optogenetics will greatly  
214 improve our understanding of a wide range of microbe-host interactions.

215

## 216 **Acknowledgements**

217 The LED array used to illuminate *C. elegans* plates was designed by Brian Landry &  
218 Sebastián Castillo-Hair. The mounting hardware for the microscope LED array was designed by  
219 Ravi Sheth. We thank Ravi Sheth for discussions during early stages of the project. We thank Dr.  
220 Joel Moake for the use of his cytometer. This work was supported by the John S. Dunn  
221 Foundation (J.J.T. and M.C.W.) and US National Institutes of Health, 1R21NS099870-01  
222 (J.J.T.), DP1DK113644 (M.C.W.), R01AT009050 (M.C.W.). LAH was supported by a NASA  
223 Office of the Chief Technologist Space Technology Research Fellowship (NSTRF  
224 NNX11AN39H).

225

## 226 **Author Contributions**

227 JJT and MW conceived of the study. LAH and MVK designed experiments. MVK and LAH  
228 constructed plasmids and strains. LAH, MVK, BH, CJL, LG, and MW performed experiments.  
229 CJL and LG scored single-blinded mitochondrial confocal micrographs. LAH, MVK, and MW  
230 analyzed and interpreted results. LAH, MW, and JJT wrote the manuscript.

231

232 **Declaration of Interests**

233 The authors declare no competing interests.

234

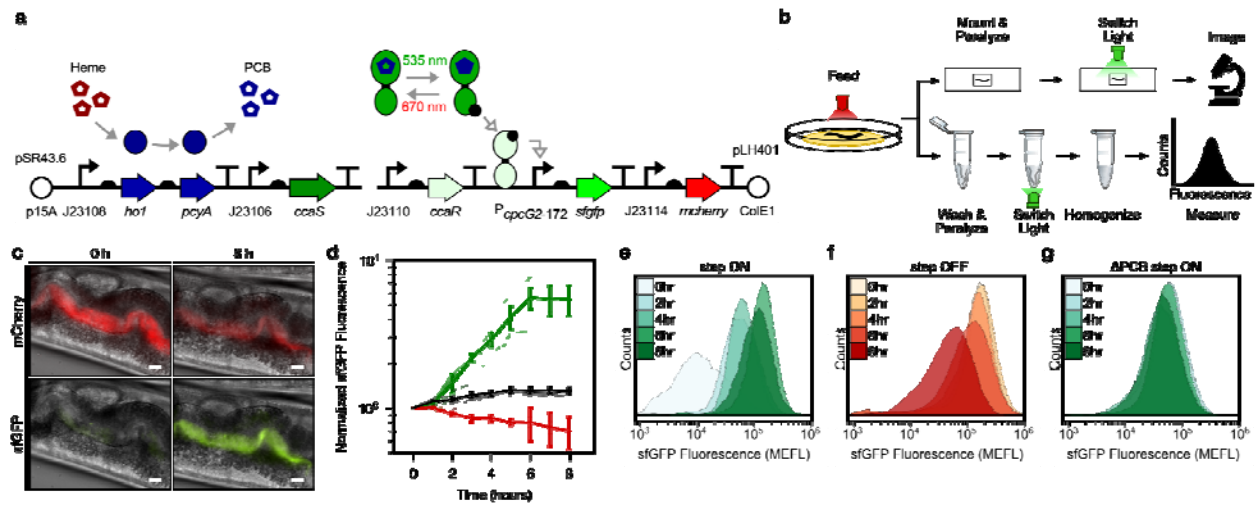

235 **Figures and legends**

236

237 **Figure 1. Optogenetic control of *C. elegans* gut bacterial gene expression.** (a) Strain LH01.

238 (b) Microscopy and cytometry workflows. (c) Fluorescence microscopy images 0 and 8 h after

239 green light exposure in the step ON experiment. Scale bar: 10  $\mu$ m. (d) Response dynamics in the

240 step ON (green) and step OFF (red) microscopy experiments. Black:  $\Delta$ PCB strain (step ON

241 experiment). Individual- (light lines) and multi-worm average (dark lines) data are shown.  $n = 7$ ,

242 4, 6 worms for green, red, black data sets (measured over 2, 3, 1 days, respectively). Error bars:

243 SEM. (e-g) Flow cytometry histograms for response dynamics experiments. MEFL: molecules of

244 equivalent fluorescein.

245

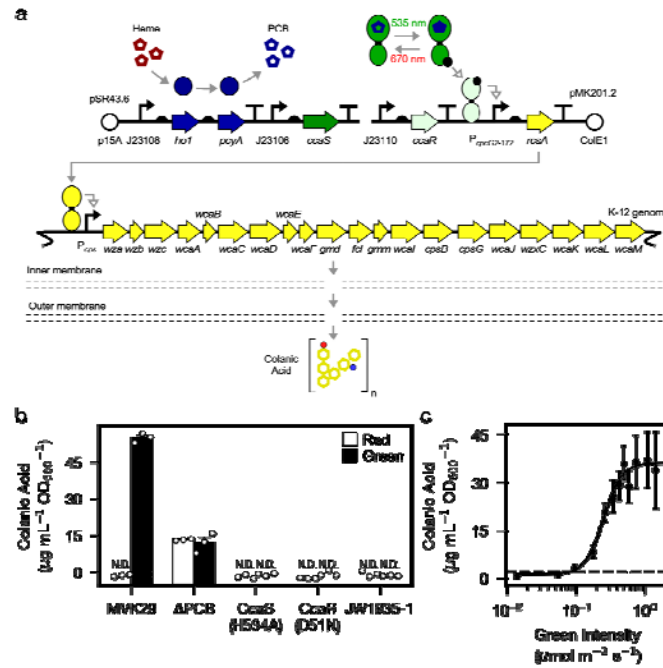

246

247 **Figure 2. Optogenetic control of colanic acid biosynthesis.** (a) Strain MVK29. (b) CA

248 secretion levels for MVK29 and control strains exposed to red and green light. JW1935-1 is the

249 *E. coli rcsA* background strain used in this study. N.D.: below assay limit of detection. (c)

250 Green light intensity versus CA secretion level for MVK29. Data points represent 3 biological

251 replicates collected on a single day. Dashed line: limit of detection. Error bars indicate standard

252 deviation of the three biological replicates.

253

254

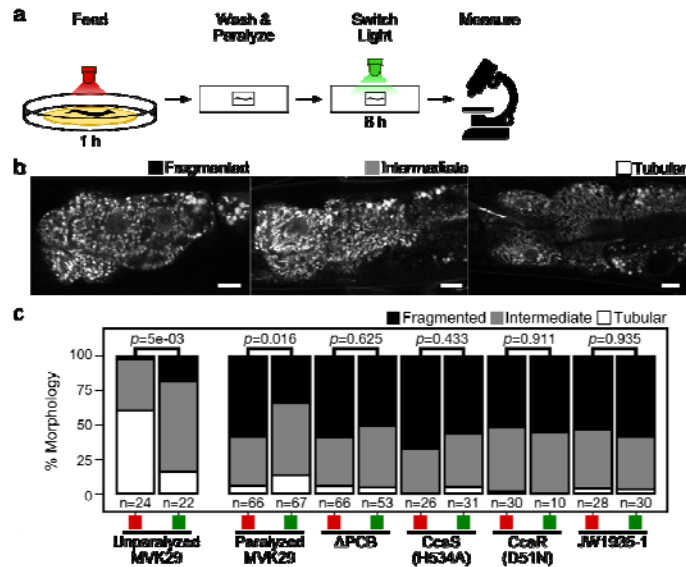

255

256 **Figure 3. Light-regulated CA secretion modulates *C. elegans* mitochondrial dynamics. (a)**

257 Schematic of experiment for activating CA biosynthesis *in situ*. (b) Representative images of the

258 mitochondrial network of anterior intestinal cells immediately distal to the pharynx are scored as

259 fragmented, intermediate, or tubular, as previously (Han et al., 2017). Scale bars: 10  $\mu$ m. (c)

260 Mitochondrial fragmentation profiles of un-paralyzed worms fed MVK29 while exposed to red

261 or green light for 6 h. (d) Fragmentation profiles for worms fed the indicated strain, then

262 paralyzed for 6 h while exposed to red or green light. The number of worms included in each

263 condition is indicated below each bar. The Chi-Squared Test of Homogeneity was used to

264 calculate *p*-values between conditions.

265

266

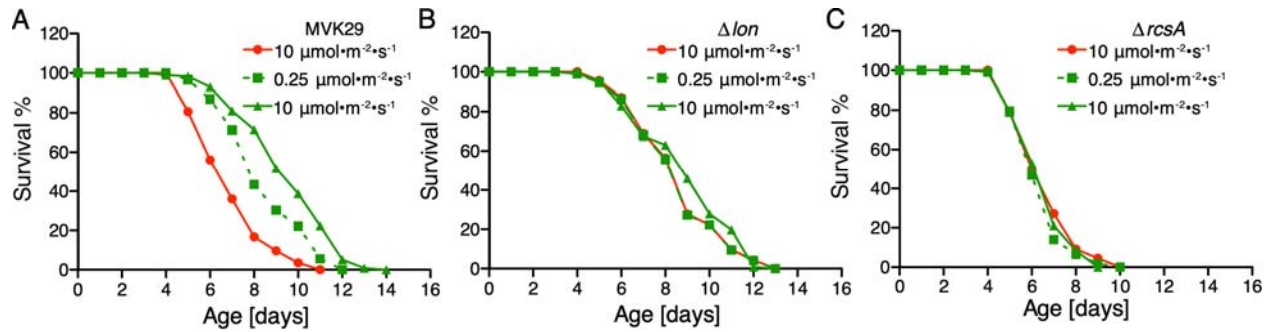

267

268 **Figure 4. Optogenetically-regulated CA biosynthesis extends worm lifespan.** (a) When

269 exposed to green light, worms grown on MVK29 live longer than those exposed to red light, and

270 the magnitude of lifespan extension is proportional to green light intensity ( $p < 0.0001$  green vs.

271 red, log-rank test). (b-c) The lifespans of worms grown on the  $\Delta lon$  (b) or the  $\Delta rcsA$  (c) controls

272 are not affected by light condition ( $p > 0.1$  green vs. red, log-rank test).

273

274



## 275 **Methods**

### 276 *E. coli* plasmids, strains, and media

277 Plasmids used in this study are described in **Supplementary Table 1**. Genbank accession  
278 numbers are given in **Supplementary Table 2**. All plasmids constructed in this study were  
279 assembled via Golden Gate cloning(Engler et al., 2009). Primers were ordered from IDT  
280 (Coralville, IA). Assembled plasmids were transformed into *E. coli* NEB10 $\beta$  (New England  
281 Biolabs) for amplification and screening. All plasmid sequences were confirmed by Sanger  
282 sequencing (Genewiz; S. Plainfield, NJ). To construct pLH401 and pLH405, pSR58.6(Schmidl  
283 et al., 2014) was modified by inserting an *mCherry* expression cassette composed of a  
284 constitutive promoter (J23114; <http://parts.igem.org/Promoters/Catalog/Anderson>), RBS  
285 (BBa\_B0034; [http://parts.igem.org/Part:BBa\\_B0034](http://parts.igem.org/Part:BBa_B0034)), *mCherry*, and a synthetic transcriptional  
286 terminator (L3S1P52 (Chen et al., 2013)). To construct pLH405, pLH401 was further modified  
287 by exchanging the superfolder GFP gene (*sfgfp*) for *gfpmut3\**. pMVK201.2 was built by  
288 modifying pSR58.6 to control expression of *rcaA*.

289 All *E. coli* strains are described in **Supplementary Table 3**.  $\Delta rcaA$  (JW1935-1) was  
290 obtained from the Coli Genetic Stock Center.  $\Delta lon$  (JW0429-1) was obtained from the Keio *E.*  
291 *coli* knockout library(Baba et al., 2006), a gift from the Herman lab. All *E. coli* strains were  
292 maintained in LB media supplemented with appropriate antibiotics (chloramphenicol 34  $\mu$ g/mL,  
293 spectinomycin 100  $\mu$ g/mL, kanamycin 100  $\mu$ g/mL) in a shaking incubator at 37 °C and 250 rpm  
294 unless otherwise noted.

295

296 *C. elegans* strains and media

297 All *C. elegans* strains (**Supplementary Table 3**) were provided by the Caenorhabditis  
298 Genetics Center (University of Minnesota), which is funded by the NIH office of Research  
299 Infrastructure Programs (P40 OD010440). Worms were grown at 20°C on 1.7% NGM-agar  
300 plates in 60 mm Petri dishes inoculated with a lawn of *E. coli* (CGSC str. BW28357), as  
301 described in the CGC WormBook (wormbook.org), unless otherwise specified. The common  
302 strain *E. coli* OP50 was not used for worm feeding, as it produces CA during normal growth (Han  
303 et al., 2017). M9 buffer for *C. elegans* (abbreviated M9Ce to distinguish from *E. coli* M9 media)  
304 was composed of 3 g KH<sub>2</sub>PO<sub>4</sub>, 6 g Na<sub>2</sub>HPO<sub>4</sub>, 5 g NaCl, 1 mL 1 M MgSO<sub>4</sub>, H<sub>2</sub>O to 1 L, and  
305 sterilized by autoclaving (wormbook.org).

306

307 Optogenetic control of CA production

308 3 mL starter cultures of appropriate *E. coli* strains were inoculated from a -80°C freezer  
309 and grown 12 h at 37°C. These starters were diluted to OD<sub>600</sub> = 1x10<sup>-2</sup> in M9 minimal media (1x  
310 M9 salts, 0.4% w/v glucose, 0.2% w/v casamino acids, 2 mM MgSO<sub>4</sub>, 100 μM CaCl<sub>2</sub>)  
311 supplemented with appropriate antibiotics. The M9/cell mixtures were then distributed into 3 mL  
312 aliquots in 15 mL clear polystyrene culture tubes and grown at 37°C in a shaking incubator at  
313 250 rpm while illuminated with the appropriate light wavelength and intensity, using the Light  
314 Tube Array (LTA) device (Gerhardt et al., 2016). After 22 h, cultures were removed and iced to  
315 halt growth and the OD<sub>600</sub> was measured. Culture samples were collected for CA quantification.

316

317 CA quantification

318 We adapted a previous CA quantification protocol(DISCHE, 1947; DISCHE and  
319 SHETTLES, 1948) that takes advantage of the fact that it is the only exopolysaccharide  
320 produced in our *E. coli* strains that incorporates fucose. In particular, we quantified the amount  
321 of fucose in cell-derived exopolysaccharides (EPS), and used that value as a proxy CA levels.  
322 First, EPS was liberated from cells by boiling 2 mL of culture for 15 min. in a 15 mL conical  
323 tube. The sample was then centrifuged in 1.5 mL Eppendorf tubes for 15 min. at 21,000 x g.  
324 Then, 0.7 mL of supernatant was dialyzed against water for at least 12 h using Pur-A-Lyzer Midi  
325 3500 dialysis mini-tubes (Sigma-Aldrich, PURD35100-1KT) to remove monomeric fucose from  
326 the sample.

327 Fucose monomers were then liberated from the EPS polymers by hydrolyzing 0.2 mL of  
328 dialyzed media with 0.9 mL of H<sub>2</sub>SO<sub>4</sub> solution (6:1 v/v acid:water). This mixture was boiled in a  
329 15 mL conical for 20 min and then cooled to room temperature. The absorbance at 396 nm and  
330 427 nm was measured. Next, 25 µL of 1 M L-cysteine HCl was added and mixed thoroughly by  
331 pipetting. The absorbance at 396 nm and 427 nm was measured again. Simultaneously,  
332 absorbance measurements of L-fucose standards pre- and post-L-cysteine addition were also  
333 recorded. Absorbance change, given by *D* in the formula below, were used to compare the L-  
334 fucose standard samples to the dialyzed culture samples and estimate the L-fucose concentration  
335 in the dialyzed product.

$$D = \left( (A_{post}^{396} - A_{pre}^{396}) - (A_{post}^{427} - A_{pre}^{427}) \right)$$

336

337 Preparation of NGM-agar plates for worm feeding

338           3 mL *E. coli* starter cultures were inoculated from -80 °C freezer stocks and grown for 12  
339 h at 37 °C. These starters were then diluted to  $OD_{600} = 1 \times 10^{-6}$  in M9 minimal media  
340 supplemented with appropriate antibiotics. The M9/cell mixture was then distributed into 3mL  
341 aliquots in 15 mL clear polystyrene culture tubes and grown at 37 °C in a shaking incubator at  
342 250 rpm while illuminated with the appropriate light in the LTA. Once cultures reached  $OD_{600} =$   
343 0.1-0.4, tubes were iced for 10 min and subsequently concentrated to  $OD_{600} \sim 20$  by  
344 centrifugation (4 °C, 4000 rpm, 10 min) and resuspension in fresh M9 media. 400-600  $\mu$ L of  
345 dense bacterial culture was then applied to sterile NGM-agar plates and allowed to dry in a dark  
346 room, or a room with green overhead safety lights if cultures were preconditioned in green light.  
347 Plates were wrapped in foil and refrigerated at 4 °C for no more than 5 days until needed.

348

349 Time-lapse microscopy

350           To obtain age-synchronized worm cultures, axenized *C. elegans* (strain *glo-1*) eggs were  
351 isolated and allowed to arrest in L1 by starvation in M9 buffer (distinct from M9 media: 3 g  
352  $KH_2PO_4$ , 6 g  $Na_2HPO_4$ , 5 g NaCl, 1 mL 1M  $MgSO_4$ , and water to 1 L, sterilized by autoclaving  
353 at 121 °C for 20 min) at room temperature for 12-18 h. 10-100 larvae were transferred to a  
354 previously prepared NGM-agar plate containing a lawn of the appropriate bacterial strain. The  
355 plate was then placed in a 20 °C incubator and illuminated with appropriate optogenetic light  
356 provided by a single LED positioned 1cm above the Petri dish. Adult worms were transferred to  
357 a fresh plate as necessary to maintain only a single generation.

358 Individual worms aged 1-3 days were removed from the dish and prepared for time-lapse  
359 epifluorescence imaging. A 1.5% agar pad was prepared using M9 buffer as previously  
360 described<sup>45</sup>, and punched into ½” circles with a hollow punch. A 4 µL droplet of 2 mM  
361 levamisole was deposited on a pad and 5 adult worms were transferred from the NGM plate to  
362 the droplet. An additional 4 µL of levamisole solution was added and the worms were gently  
363 washed to remove external bacteria. Worms were then transferred to a fresh pad with a 4 µL  
364 droplet of levamisole solution, which was allowed to dry, thereby co-localizing and aligning the  
365 worms on the pad. The pad was then inverted and placed into a 13 mm disposable microscopy  
366 petri dish with a #1.5 coverslip on the bottom (Cell E&G; Houston, TX). Another coverslip was  
367 placed on the top of the pad in the dish to curtail evaporation.

368 The dish was then placed on the stage of a Nikon Eclipse Ti-E inverted epifluorescence  
369 microscope (Nikon Instruments, Inc; Melville, NY). Complete paralysis was induced by  
370 incubating the dish at room temperature (~23 °C) for 30 min. Meanwhile, worms were exposed  
371 to appropriate preconditioning light supplied by a circular array of 8 LEDs (4 x 660 nm, 4 x 525  
372 nm) mounted to the microscope condenser ring, about 2 cm above the Petri dish. Light was then  
373 switched from the preconditioning to the experimental wavelength, and worms were imaged  
374 periodically using 10x, 40x, and 60x objectives. For each time point, the LEDs were turned off  
375 and images acquired in the brightfield (DIC) and fluorescent channels. Afterwards, the LEDs  
376 were turned on again to maintain optogenetic control.

377

### 378 Epifluorescence image analysis

379 All epifluorescence images were analyzed using the Nikon Elements software package  
380 (Nikon Instruments, Inc; Melville, NY). The mCherry signal was used as a marker for the gut

381 lumen, and only cells in this region were included in the analysis. Image ROIs were created by  
382 thresholding the sfGFP signal to identify the boundaries of cell populations. Out of focus regions  
383 were eliminated from analysis. The average sfGFP pixel intensity inside the ROIs was calculated  
384 and recorded for each time point.

385

### 386 Flow cytometry

387 1-3 day old *glo-1* worms were prepared for flow cytometry of the microbiome  
388 constituents by washing, using a protocol adapted from previous work (Portal-Celhay et al.,  
389 2012). Groups of 5 worms were washed 2x in a 5  $\mu$ L droplet of lytic solution: *C. elegans* M9  
390 buffer containing 2 mM levamisole, 1% Triton X-100, and 100 mg/mL ampicillin. The worms  
391 were then washed 2x in 5  $\mu$ L droplets of M9 buffer containing 2 mM levamisole only. Finally,  
392 the worms were transferred to clear 0.5 mL Eppendorf tubes containing 50  $\mu$ L of M9 buffer + 2  
393 mM levamisole, ensuring that 5 worms were deposited in the liquid contained in each tube. Each  
394 tube was then exposed to light by placing it within one well of a 24-well plate (AWLS-303008,  
395 ArcticWhite LLC) atop a Light Plate Apparatus (LPA) containing green and red LEDs<sup>47</sup> for 8 h  
396 at room temperature. In separate control experiments, we demonstrated that any stray bacteria  
397 that may escape the worms over this period, or which were inadvertently added to the 50  $\mu$ L of  
398 M9 buffer, are incapable of responding to optogenetic light (**Supplementary Fig. 4**).

399 At the conclusion of the experiment, tubes were removed from the plate and immediately  
400 chilled in an ice slurry for 10 min in the dark. Worms were homogenized using an anodized steel  
401 probe sterilized between samples via 70% ethanol treatment and flame before being cooled.

402           Next, we used our previous antibiotic-based fluorescent protein maturation  
403 protocol(Olson et al., 2014) to allow unfolded proteins to mature while preventing the production  
404 of new protein. In particular, 250  $\mu$ L PBS containing 500 mg/mL Rifampicin was added to the  
405 50  $\mu$ L homogenized worm samples and transferred to cytometry tubes. These tubes were  
406 incubated in a 37°C water bath for precisely 1 h, then transferred back to an ice slurry.

407           These samples were measured on a BD FACScan flow cytometer. For gating, an  
408 FSC/SSC polygon gate was first created using non-fluorescent bacteria grown *in vitro* at 37°C  
409 (**Supplementary Fig. 2**). Events outside this region were excluded as non-bacterial material. To  
410 isolate the engineered gut bacteria, only events with a high mCherry signal (FL3 > 1200 a.u.,  
411 FL3 gain: 999) were included (**Supplementary Fig. 2**). Samples were measured until 20,000  
412 events were recorded or the sample was exhausted.

413

#### 414 Flow cytometry data analysis

415           All flow cytometry data (FCS format) were analyzed using FlowCal(Castillo-Hair et al.,  
416 2016) and Python 2.7. We wrote a standard cytometry analysis workflow that truncated the  
417 initial and final 10 events to prevent cross-sample contamination, removed events from saturated  
418 detector bins at the ends of the detection range, and added 2D density gate on SSC/FSC retaining  
419 the densest 75% of events (**Supplementary Fig. 2a**). GFPmut3\* fluorescence units were  
420 converted into standardized units of molecules of equivalent fluorescein (MEFL) using a  
421 fluorescent bead standard (Rainbow calibration standard; cat. no. RCP-30-20A, Spherotech, Inc.)  
422 as described previously(Castillo-Hair et al., 2016). Finally, to eliminate events associated with *C.*  
423 *elegans* autofluorescence (**Supplementary Fig. 2b**), any events in the region  $FL1 \leq 1200$  MEFL  
424 were discarded.

425

426 Mitochondrial Fragmentation Assays

427 Synchronized L1 worms (strain *ges-1*) were applied to NGM agar plates containing  
428 bacterial strain BW25113 and allowed to develop until adulthood. This parental bacterial strain is  
429 used to allow all worms to develop at the same rate, avoiding any developmental/growth effects  
430 the experimental strains may exert on the worms. All experimental bacterial strains were  
431 preconditioned in red light with optogenetic light provided by a single LED positioned 1 cm  
432 above the Petri dish.

433 After 3-5 days (between days 1-3 of adulthood), worms allocated for the experiment were  
434 transferred to experimental strains for approximately 60-90 minutes to thoroughly inoculate the  
435 GI tract. In the case of the unparalyzed worms, red or green light was then applied for an  
436 additional 6 hours. For the paralyzed worm experiments, 1.5% low-melt agar pads were prepared  
437 as described above and placed on individual slides. About 15 adult worms were transferred from  
438 the experimental strain Petri dish to an agar pad containing 10  $\mu$ L of *C. elegans* M9 buffer + 2  
439 mM levamisole (M9Ce+Lev), where worms were gently washed before being transferred to a  
440 fresh pad also containing 10  $\mu$ L of M9Ce+Lev. The majority of M9Ce+Lev on the pad was  
441 allowed to evaporate, which causes the worms to align longitudinally before a cover slip was  
442 applied. Slides were then exposed to either red or green light by placing them under a single  
443 LED positioned 1 cm above the Petri dish for 6 h. Afterward, the anterior intestinal cells were  
444 imaged using confocal microscopy (Olympus Fluoview 3000) in the brightfield and GFP  
445 channels.



446

#### 447 Confocal Microscopy Image Analysis

448 All confocal images for an experiment were manually cropped to display only the  
449 anterior intestinal cells of a single worm (in the GFP channel). These cropped images were then  
450 anonymized, randomized and the mitochondrial networks of each were blindly classified by two  
451 researchers independently as either tubular, fragmented, or intermediate. Tubular samples were  
452 marked by a high degree of network connectivity throughout. Fragmented samples were  
453 composed almost exclusively of isolated clusters of fluorescence with high circularity.  
454 Intermediate samples contained regions of both types. Scores were then de-randomized and  
455 aggregated. For each experimental strain, the red and green light conditions were compared for  
456 statistical significance using the chi-squared test of homogeneity.

457

#### 458 Lifespan experiments

459 3 mL starter cultures of  $\Delta lon$ ,  $\Delta rcsA$  or MVK29 were inoculated from -80°C freezer  
460 stocks into LB supplemented with appropriate antibiotics and grown shaking for 12 h at 37 °C at  
461 250 rpm. These cultures were diluted to  $OD_{600} = 1 \times 10^{-6}$  in 27 mL M9 media supplemented with  
462 appropriate antibiotics. 1.5 mL of each M9/cell mixture was added to each of 18 wells on three  
463 24-well plates and grown in 3 LPA devices under the appropriate light conditions at 37 °C and  
464 250 rpm. Once cultures reached  $OD_{600} = 0.1-0.4$ , all tubes were iced for 10 min and subsequently  
465 concentrated 10 times by centrifugation (4°C, 4000 rpm, 10 min). Approximately 50  $\mu$ L of this  
466 dense bacterial culture was then applied to sterile NGM-agar plates with no antibiotics and  
467 allowed to dry in a dark room. The plates were then illuminated with the appropriate light  
468 wavelength and intensity for 16 h at room temperature, and immediately used for lifespan assays.

469           During the longitudinal lifespan assay, exposure to white light is limited to the minimal  
470 level. To reach this goal, the *sqt-3(e2117)* temperature sensitive mutant (**Supplementary Table**  
471 **3**) was used to perform longitudinal analyses at 25 °C, which avoids time-consuming animal  
472 transfer without interrupting normal reproduction. *sqt-3(e2117)* is a collagen mutant of *C.*  
473 *elegans* that reproduces normally but is embryonically lethal at 26 °C, and has been used  
474 previously in longitudinal studies (Han et al., 2017; Wang et al., 2014). Worms were age-  
475 synchronized by bleach-based egg isolation followed by starvation in M9 buffer at the L1 stage  
476 for 36 hours. Synchronized L1 worms were grown on BW25113 *E. coli* at 15 °C until the L4  
477 stage, when worms were transferred to 24-well plates (~15 worms/well) with  $\Delta lon$ ,  $\Delta rcsA$  or  
478 MVK29 (**Supplementary Table 3**). The plates were placed in LPA. The LPA LEDs were  
479 programmed to illuminate wells with constant red (10  $\mu\text{mol}/\text{m}^2/\text{s}$ ), low-intensity green (0.25  
480  $\mu\text{mol}/\text{m}^2/\text{s}$ ), or high-intensity green light (10  $\mu\text{mol}/\text{m}^2/\text{s}$ ). The apparatus was then transferred to a  
481 26 °C incubator. The number of living worms remaining in each well was counted every day.  
482 Death was indicated by total cessation of movement in response to gentle mechanical  
483 stimulation. Statistical analyses were performed with SPSS (IBM Software) using Kaplan-Meier  
484 survival analysis and the log-rank test (**Supplementary Table 4**).

485

#### 486 **Supplemental Information Titles and Legends**

487 **Supplementary Figure 1. *In vitro* characterization of GFP reporter strains used in this**  
488 **study.** All optogenetic strains carry our previously published CcaSR v2.0 system, which is  
489 encoded on plasmids (a) pSR43.6 and (b) pSR58.6. (c) pLH401 (used for microscopy) and (d)  
490 pLH405 (used for cytometry) genetic device schematics. We replaced *sfgfp* with *gfpmut3\** in  
491 pLH405 as we hypothesized that the latter may be less stable and thus result in faster response

492 dynamics. However, we observed no difference in dynamics. (e) Batch culture light responses of  
493 CcaSR v2.0 and all GFP reporter strains used in this study. GFP fluorescence was measured by  
494 flow cytometry. The dynamic range (ratio of GFP fluorescence in green versus red light) is  
495 shown above each data set. We note that CcaSR v2.0 exhibits 77-fold dynamic range in the  
496 reference strain BW29655 ( $\Delta envZ$ ,  $\Delta ompR$ ), which is similar to our previous measurement of  
497 this strain at 120-fold (Schmidl et al., 2014). The calculated fold-change is sensitive to  
498 fluctuations in the measured *E. coli* autofluorescence and red-light expression level, which likely  
499 explains the slight discrepancy. CcaSR v2.0 dynamic range increases slightly to 84.2-fold in  
500  $\Delta rcsA$  (JW1935-1), which is used throughout this work, due to higher sfGFP expression in green  
501 light. The mCherry cassette in pLH401 decreases dynamic range to 38.3-fold due to higher leaky  
502 sfGFP expression in red light. In worms, the fold-change in response to green light decreases  
503 further to  $5.52 \pm 2.4$ -fold (**Fig. 1d**). The use of *gfpmut3\** in pLH405 further decreases dynamic  
504 range to  $13.5 \pm 0.0$ -fold for reasons that are not clear, while in worms the fold-change is  $8.63 \pm$   
505  $3.6$ -fold (**Fig. 1e**). Data represent the mean of three independent, autofluorescence-subtracted,  
506 biological replicates acquired on 3 separate days. Error bars: standard deviation.

507

508 **Supplementary Figure 2. Flow cytometry gating.** (a) Strain LH05 (**Supplementary Table 3**),  
509 which expresses only mCherry, was fed to worms, isolated, and analyzed by flow cytometry to  
510 quantify *E. coli* autofluorescence through the FL1 (GFP) channel. To eliminate events  
511 corresponding to cytometer noise and autofluorescence of homogenized worm samples, three  
512 gates were then applied: (1) a density gate for the most homogeneous 75% of samples in forward  
513 scatter (FSC) vs side-scatter (SSC) (the area within the bold black line in the plots in Column 1),  
514 (2) a threshold gate on the FL1 (GFP) channel (marked by a red dashed line; **Methods**), and (3) a

515 threshold gate for events exhibiting high FL3 (mCherry, red dashed line; **Methods**). (b)  
516 Applying these gates to samples from the step ON experiment (**Fig. 1e**) reveals robust isolation  
517 of bacteria with a FSC/SSC profile consistent with our previous *in vitro* experiments<sup>24,47</sup> and an  
518 increase in expression of GFPmut3\* in response to green light. Ungated data are shown for  
519 comparison to gated data in all plots.

520

521 **Supplementary Figure 3. Gene expression dynamics from flow cytometry experiments.** (a)  
522 LH03 and (b) LH04 ( $\Delta$ PCB) step ON results. (c) LH03 and (d) LH04 step OFF results. Each  
523 individual trajectory (faint lines) corresponds to a single biological replicate. A biological  
524 replicate comprises the homogenized contents of five worms collected on a single day. Each  
525 biological replicate on a given plot was run on a different day. Population medians taken across  
526 all trajectories are shown in bold (**Methods**). Data are composed of six and eight trajectories in  
527 the step ON and step OFF experiments, respectively. Error bars: SEM.

528

529 **Supplementary Figure 4. Bacteria on the exterior of worms do not contribute to the**  
530 **measured light response in flow cytometry experiments.** Worms were suspended in clear  
531 tubes containing M9Ce+Lev media and levamisole in the flow cytometry experiments. To  
532 demonstrate that bacterial cells outside the worm gut (e.g. on the exterior of the worm) do not  
533 respond to light in these conditions, samples of pre-conditioned bacteria from the NGM plates  
534 were suspended in the M9Ce+Lev or *E. coli* M9 media supplemented with casamino acids and  
535 glucose (M9Ec). These samples were then exposed to either green or red light for 8 h, then  
536 measured via flow cytometry after the fluorophore maturation protocol (**Methods**). As expected,

537 the bacterial populations are only responsive to light when grown in M9Ec and when the PCB  
538 operon is intact (strain JW1935-1/pLH405/pSR43.6, aka LH03). We conclude that the responses  
539 shown in data in **Fig. 1e-f** and **Supplementary Fig. 3** are not due to bacteria outside the worm,  
540 nor to bacteria that escape the worm over the course of the experiment, as such cells do not  
541 respond to light in the experimental buffer (M9Ce). Data represent 7, 6, 3, and 5 replicates (left);  
542 and 8, 3, 8, and 3 replicates (right) over 8 and 10 days, respectively; error bars: SEM. Individual  
543 data points for each condition are overlaid as white markers.

544 **Supplementary Table 1. Plasmids used in this study**

545 **Supplementary Table 2. Genbank Accession Numbers**

546 **Supplementary Table 3. Bacterial and worm strains used in this study**

547 **Supplementary Table 4. Statistical analysis of worm lifespan experiments**

548

549 **References**

550

551 Baba T, Ara T, Hasegawa M, Takai Y, Okumura Y, Baba M, Datsenko KA, Tomita M, Wanner  
552 BL, Mori H. 2006. Construction of Escherichia coli K12 in-frame, single-gene knockout  
553 mutants: the Keio collection. *Mol Syst Biol* 2:2006.0008. doi:10.1038/msb4100050

554 Biagi E, Franceschi C, Rampelli S, Severgnini M, Ostan R, Turrone S, Consolandi C, Quercia S,  
555 Scurti M, Monti D, Capri M, Brigidi P, Candela M. 2016. Gut Microbiota and Extreme  
556 Longevity. *Curr Biol* 26:1480–1485. doi:10.1016/j.cub.2016.04.016

- 557 Cabreiro F, Au C, Leung K-Y, Vergara-Irigaray N, Cochemé HM, Noori T, Weinkove D,  
558 Schuster E, Greene NDE, Gems D. 2013. Metformin retards aging in *C. elegans* by altering  
559 microbial folate and methionine metabolism. *Cell* **153**:228–39. doi:10.1016/j.cell.2013.02.035
- 560 Castillo-Hair SM, Baerman EA, Fujita M, Igoshin OA, Tabor JJ. 2019. Optogenetic control of  
561 *Bacillus subtilis* gene expression. *Nat Commun* **10**:3099. doi:10.1038/s41467-019-10906-6
- 562 Castillo-Hair SM, Sexton JT, Landry BP, Olson EJ, Igoshin OA, Tabor JJ. 2016. FlowCal: A  
563 User-Friendly, Open Source Software Tool for Automatically Converting Flow Cytometry  
564 Data from Arbitrary to Calibrated Units. *Acs Synth Biol* **5**:774–80.  
565 doi:10.1021/acssynbio.5b00284
- 566 Chait R, Ruess J, Bergmiller T, Tkačik G, Guet CC. 2017. Shaping bacterial population behavior  
567 through computer-interfaced control of individual cells. *Nat Commun* **8**:1535.  
568 doi:10.1038/s41467-017-01683-1
- 569 Chen Y-J, Liu P, Nielsen AAK, Brophy JAN, Clancy K, Peterson T, Voigt CA. 2013.  
570 Characterization of 582 natural and synthetic terminators and quantification of their design  
571 constraints. *Nat Methods* **10**:659–664. doi:10.1038/nmeth.2515
- 572 Cho D-H, Nakamura T, Fang J, Cieplak P, Godzik A, Gu Z, Lipton SA. 2009. S-nitrosylation of  
573 Drp1 mediates beta-amyloid-related mitochondrial fission and neuronal injury. *Sci New York*  
574 *N Y* **324**:102–5. doi:10.1126/science.1171091
- 575 Claesson MJ, Cusack S, O’Sullivan O, Greene-Diniz R, Weerd H de, Flannery E, Marchesi JR,  
576 Falush D, Dinan T, Fitzgerald G, Stanton C, Sinderen D van, O’Connor M, Harnedy N,  
577 O’Connor K, Henry C, O’Mahony D, Fitzgerald AP, Shanahan F, Twomey C, Hill C, Ross  
578 RP, O’Toole PW. 2010. Composition, variability, and temporal stability of the intestinal

- 579 microbiota of the elderly. *P Natl Acad Sci Usa* **108 Suppl 1**:4586–91.  
580 doi:10.1073/pnas.1000097107
- 581 Claesson MJ, Jeffery IB, Conde S, Power SE, O'Connor EM, Cusack S, Harris HMB, Coakley  
582 M, Lakshminarayanan B, O'Sullivan O, Fitzgerald GF, Deane J, O'Connor M, Harnedy N,  
583 O'Connor K, O'Mahony D, Sinderen D van, Wallace M, Brennan L, Stanton C, Marchesi JR,  
584 Fitzgerald AP, Shanahan F, Hill C, Ross RP, O'Toole PW. 2012. Gut microbiota composition  
585 correlates with diet and health in the elderly. *Nature* **488**:178–84. doi:10.1038/nature11319
- 586 Couillault C, Ewbank JJ. 2002. Diverse Bacteria Are Pathogens of *Caenorhabditis elegans*. *Infect*  
587 *Immun* **70**:4705–4707. doi:10.1128/iai.70.8.4705-4707.2002
- 588 Deisseroth K. 2015. Optogenetics: 10 years of microbial opsins in neuroscience. *Nat Neurosci*  
589 **18**:1213–25. doi:10.1038/nn.4091
- 590 DISCHE Z. 1947. A new specific color reaction of hexuronic acids. *J Biological Chem* **167**:189–  
591 98.
- 592 DISCHE Z, SHETTLES LB. 1948. A specific color reaction of methylpentoses and a  
593 spectrophotometric micromethod for their determination. *J Biological Chem* **175**:595–603.
- 594 Donato V, Ayala FR, Cogliati S, Bauman C, Costa JG, Leñini C, Grau R. 2017. *Bacillus subtilis*  
595 biofilm extends *Caenorhabditis elegans* longevity through downregulation of the insulin-like  
596 signalling pathway. *Nat Commun* **8**:14332. doi:10.1038/ncomms14332
- 597 Engler C, Gruetzner R, Kandzia R, Marillonnet S. 2009. Golden gate shuffling: a one-pot DNA  
598 shuffling method based on type II restriction enzymes. *Plos One* **4**:e5553.  
599 doi:10.1371/journal.pone.0005553

- 600 Exner N, Treske B, Paquet D, Holmstrom K, Schiesling C, Gispert S, Carballo-Carbajal I, Berg  
601 D, Hoepken H-H, Gasser T, Kruger R, Winklhofer KF, Vogel F, Reichert AS, Auburger G,  
602 Kahle PJ, Schmid B, Haass C. 2007. Loss-of-Function of Human PINK1 Results in  
603 Mitochondrial Pathology and Can Be Rescued by Parkin. *J Neurosci* **27**:12413–12418.  
604 doi:10.1523/jneurosci.0719-07.2007
- 605 Fernandez-Rodriguez J, Moser F, Song M, Voigt CA. 2017. Engineering RGB color vision into  
606 *Escherichia coli*. *Nat Chem Biol* **13**:706–708. doi:10.1038/nchembio.2390
- 607 Gautier A, Gauron C, Volovitch M, Bensimon D, Jullien L, Vriza S. 2014. How to control  
608 proteins with light in living systems. *Nat Chem Biol* **10**:533–541. doi:10.1038/nchembio.1534
- 609 Gerhardt KP, Olson EJ, Castillo-Hair SM, Hartsough LA, Landry BP, Ekness F, Yokoo R,  
610 Gomez EJ, Ramakrishnan P, Suh J, Savage DF, Tabor JJ. 2016. An open-hardware platform  
611 for optogenetics and photobiology. *Sci Rep-uk* **6**:35363. doi:10.1038/srep35363
- 612 Goglia AG, Toettcher JE. 2018. A bright future: optogenetics to dissect the spatiotemporal  
613 control of cell behavior. *Curr Opin Chem Biol* **48**:106–113. doi:10.1016/j.cbpa.2018.11.010
- 614 Gusarov I, Gautier L, Smolentseva O, Shamovsky I, Eremina S, Mironov A, Nudler E. 2013.  
615 Bacterial Nitric Oxide Extends the Lifespan of *C. elegans*. *Cell* **152**:818–830.  
616 doi:10.1016/j.cell.2012.12.043
- 617 Han B, Sivaramakrishnan P, Lin C-CJ, Neve IAA, He J, Tay LWR, Sowa JN, Sizovs A, Du G,  
618 Wang J, Herman C, Wang MC. 2017. Microbial Genetic Composition Tunes Host Longevity.  
619 *Cell* **169**:1249-1262.e13. doi:10.1016/j.cell.2017.05.036
- 620 Kenyon CJ. 2010. The genetics of ageing. *Nature* **464**:504–512. doi:10.1038/nature08980



- 621 Kim DH. 2013. Bacteria and the aging and longevity of *Caenorhabditis elegans*. *Annu Rev Genet*  
622 **47**:233–46. doi:10.1146/annurev-genet-111212-133352
- 623 Köhler P, Bachmann R. 1978. The effects of the antiparasitic drugs levamisole, thiabendazole,  
624 praziquantel, and chloroquine on mitochondrial electron transport in muscle tissue from  
625 *Ascaris suum*. *Mol Pharmacol* **14**:155–63.
- 626 Kotula JW, Kerns SJ, Shaket LA, Siraj L, Collins JJ, Way JC, Silver PA. 2014. Programmable  
627 bacteria detect and record an environmental signal in the mammalian gut. *P Natl Acad Sci*  
628 *Usa* **111**:4838–43. doi:10.1073/pnas.1321321111
- 629 Kundu P, Blacher E, Elinav E, Pettersson S. 2017. Our Gut Microbiome: The Evolving Inner  
630 Self. *Cell* **171**:1481–1493. doi:10.1016/j.cell.2017.11.024
- 631 Leopold AV, Chernov KG, Verkhusha VV. 2018. Optogenetically controlled protein kinases for  
632 regulation of cellular signaling. *Chem Soc Rev* **47**:2454–2484. doi:10.1039/c7cs00404d
- 633 Levskaya A, Chevalier AA, Tabor JJ, Simpson ZB, Lavery LA, Levy M, Davidson EA, Scouras  
634 A, Ellington AD, Marcotte EM, Voigt CA. 2005. Engineering *Escherichia coli* to see light.  
635 *Nature* **438**:441–442. doi:10.1038/nature04405
- 636 Li X, Zhang C, Xu X, Miao J, Yao J, Liu R, Zhao Y, Chen X, Yang Y. 2020. A single-  
637 component light sensor system allows highly tunable and direct activation of gene expression  
638 in bacterial cells. *Nucleic Acids Res*. doi:10.1093/nar/gkaa044
- 639 Lim B, Zimmermann M, Barry NA, Goodman AL. 2017. Engineered Regulatory Systems  
640 Modulate Gene Expression of Human Commensals in the Gut. *Cell* **169**:547-558.e15.  
641 doi:10.1016/j.cell.2017.03.045

- 642 Miliias-Argeitis A, Rullan M, Aoki SK, Buchmann P, Khammash M. 2016. Automated  
643 optogenetic feedback control for precise and robust regulation of gene expression and cell  
644 growth. *Nat Commun* **7**:12546. doi:10.1038/ncomms12546
- 645 Mimee M, Tucker AC, Voigt CA, Lu TK. 2015. Programming a Human Commensal Bacterium,  
646 *Bacteroides thetaiotaomicron*, to Sense and Respond to Stimuli in the Murine Gut Microbiota.  
647 *Cell Syst* **1**:62–71. doi:10.1016/j.cels.2015.06.001
- 648 Ohlendorf R, Vidavski RR, Eldar A, Moffat K, Möglich A. 2012. From Dusk till Dawn: One-  
649 Plasmid Systems for Light-Regulated Gene Expression. *J Mol Biol* **416**:534–542.  
650 doi:10.1016/j.jmb.2012.01.001
- 651 Olson EJ, Hartsough LA, Landry BP, Shroff R, Tabor JJ. 2014. Characterizing bacterial gene  
652 circuit dynamics with optically programmed gene expression signals. *Nat Methods* **11**:449–  
653 55. doi:10.1038/nmeth.2884
- 654 Olson EJ, Tabor JJ. 2014. Optogenetic characterization methods overcome key challenges in  
655 synthetic and systems biology. *Nat Chem Biol* **10**:502–11. doi:10.1038/nchembio.1559
- 656 Olson EJ, Tzouanas CN, Tabor JJ. 2017. A photoconversion model for full spectral  
657 programming and multiplexing of optogenetic systems. *Mol Syst Biol* **13**:926.  
658 doi:10.15252/msb.20167456
- 659 Ong NT, Tabor JJ. 2018. A Miniaturized *Escherichia coli* Green Light Sensor with High  
660 Dynamic Range. *Chembiochem* **19**:1255–1258. doi:10.1002/cbic.201800007
- 661 Ong NTX, Olson EJ, Tabor JJ. 2017. Engineering an *E. coli* near-infrared light sensor. *Acs Synth*  
662 *Biol* **7**:240–248. doi:10.1021/acssynbio.7b00289

- 663 O'Toole PW, Jeffery IB. 2015. Gut microbiota and aging. *Sci New York N Y* **350**:1214–5.  
664 doi:10.1126/science.aac8469
- 665 Portal-Celhay C, Bradley ER, Blaser MJ. 2012. Control of intestinal bacterial proliferation in  
666 regulation of lifespan in *Caenorhabditis elegans*. *Bmc Microbiol* **12**:49. doi:10.1186/1471-  
667 2180-12-49
- 668 Pryor R, Norvaisas P, Marinos G, Best L, Thingholm LB, Quintaneiro LM, Haes WD, Esser D,  
669 Waschina S, Lujan C, Smith RL, Scott TA, Martinez-Martinez D, Woodward O, Bryson K,  
670 Laudes M, Lieb W, Houtkooper RH, Franke A, Temmerman L, Bjedov I, Cochemé HM,  
671 Kaleta C, Cabreiro F. 2019. Host-Microbe-Drug-Nutrient Screen Identifies Bacterial  
672 Effectors of Metformin Therapy. *Cell* **178**:1299-1312.e29. doi:10.1016/j.cell.2019.08.003
- 673 Ramakrishnan P, Tabor JJ. 2016. Repurposing *Synechocystis* PCC6803 UirS-UirR as a UV-  
674 Violet/Green Photoreversible Transcriptional Regulatory Tool in *E. coli*. *Acs Synth Biol*  
675 **5**:733–40. doi:10.1021/acssynbio.6b00068
- 676 Ryu M-H, Gomelsky M. 2014. Near-infrared light responsive synthetic c-di-GMP module for  
677 optogenetic applications. *Acs Synth Biol* **3**:802–10. doi:10.1021/sb400182x
- 678 Schmidl SR, Sheth RU, Wu A, Tabor JJ. 2014. Refactoring and Optimization of Light-  
679 Switchable *Escherichia coli* Two-Component Systems. *Acs Synth Biol* **3**:820–831.  
680 doi:10.1021/sb500273n
- 681 Sebastián D, Palacín M, Zorzano A. 2017. Mitochondrial Dynamics: Coupling Mitochondrial  
682 Fitness with Healthy Aging. *Trends Mol Med* **23**:201–215.  
683 doi:10.1016/j.molmed.2017.01.003

- 684 Tabor JJ, Levskaya A, Voigt CA. 2010. Multichromatic control of gene expression in  
685 *Escherichia coli*. *J Mol Biol* **405**:315–24. doi:10.1016/j.jmb.2010.10.038
- 686 Tabor JJ, Salis HM, Simpson ZB, Chevalier AA, Levskaya A, Marcotte EM, Voigt CA,  
687 Ellington AD. 2009. A synthetic genetic edge detection program. *Cell* **137**:1272–81.  
688 doi:10.1016/j.cell.2009.04.048
- 689 Tandar ST, Senoo S, Toya Y, Shimizu H. 2019. Optogenetic switch for controlling the central  
690 metabolic flux of *Escherichia coli*. *Metab Eng* **55**:68–75. doi:10.1016/j.ymben.2019.06.002
- 691 Virk B, Jia J, Maynard CA, Raimundo A, Lefebvre J, Richards SA, Chetina N, Liang Y,  
692 Helliwell N, Cipinska M, Weinkove D. 2016. Folate Acts in *E. coli* to Accelerate *C. elegans*  
693 Aging Independently of Bacterial Biosynthesis. *Cell Reports* **14**:1611–20.  
694 doi:10.1016/j.celrep.2016.01.051
- 695 Wang MC, Oakley HD, Carr CE, Sowa JN, Ruvkun G. 2014. Gene pathways that delay  
696 *Caenorhabditis elegans* reproductive senescence. *Plos Genet* **10**:e1004752.  
697 doi:10.1371/journal.pgen.1004752
- 698 Zhang F, Berg M, Dierking K, Félix M-A, Shapira M, Samuel BS, Schulenburg H. 2017.  
699 *Caenorhabditis elegans* as a Model for Microbiome Research. *Front Microbiol* **8**:485.  
700 doi:10.3389/fmicb.2017.00485

701
